# Supplementary material
Source: Springer Nature journal article supplement (https://www.springermedizin.de/resource/supplementary/12865_2005_79_MOESM3_ESM.pdf/9428466)

Withdrawal latency (s)

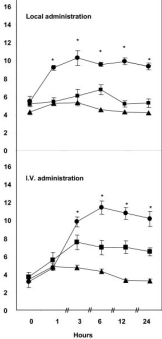

Supplement: MOESM3 [file 9428466]
